# Supplementary material for: Obese asthma phenotypes display distinct plasma biomarker profiles
Source: PubMed Central journal article supplement (PMC10032201; doi:10.1002/clt2.12238), 2023-03-22

**FIGURE S1: Inclusion of study subjects and groupings**

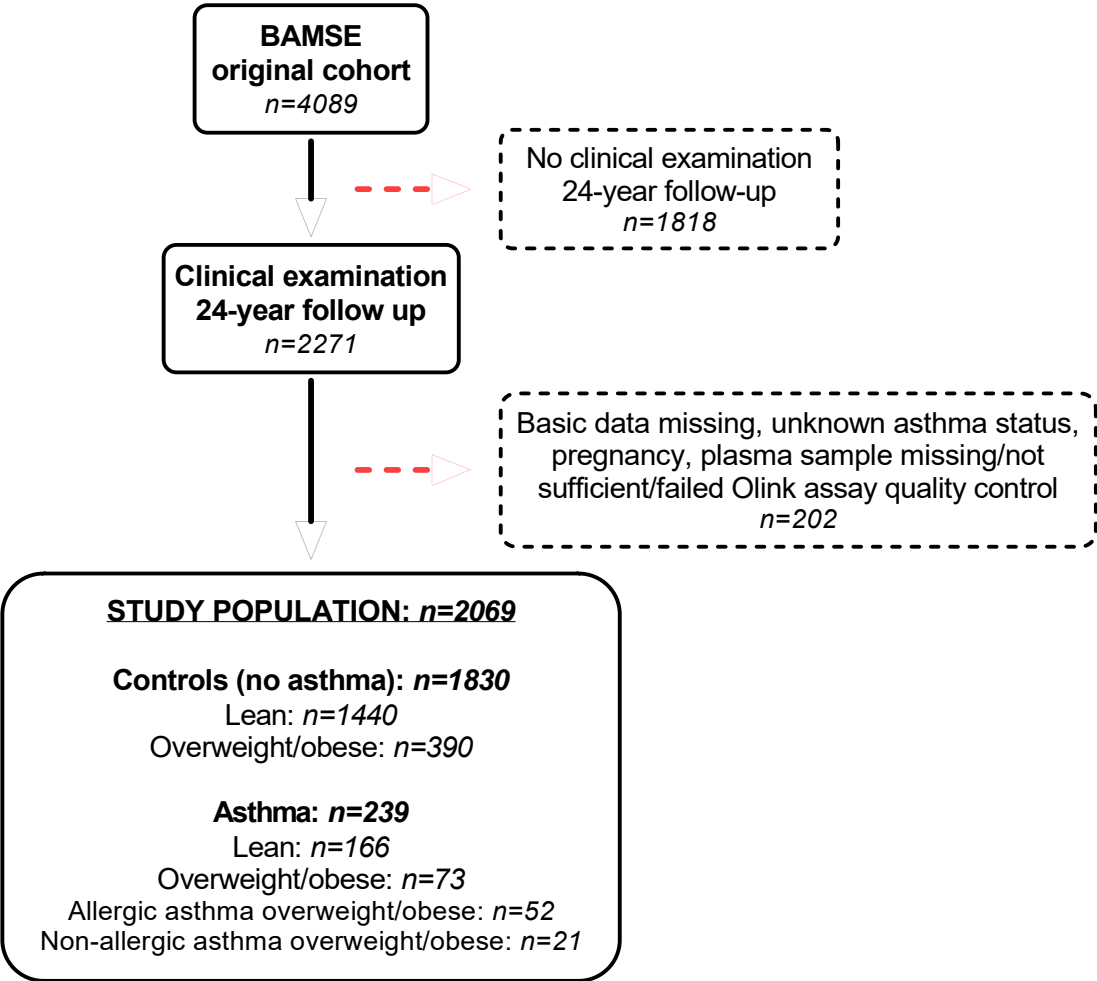

Supplement: CLT2-13-e12238-s001.pdf [file CLT2-13-e12238-s001.pdf]
