# Supplementary material for: Obese asthma phenotypes display distinct plasma biomarker profiles
Source: PubMed Central journal article supplement (PMC10032201; doi:10.1002/clt2.12238), 2023-03-22
Supplement: CLT2-13-e12238-s002.pdf [file CLT2-13-e12238-s002.pdf]

**TABLE S1. Abbreviations and full names of all proteins in the manuscript.**

| <b>Protein abbreviation</b> | <b>Protein full name</b>                                      | <b>Protein abbreviation cont.</b> | <b>Protein full name cont.</b>                               |
|-----------------------------|---------------------------------------------------------------|-----------------------------------|--------------------------------------------------------------|
| 4-EBP1                      | Eukaryotic translation initiation factor 4E-binding protein 1 | LAPTGFβ1                          | Latency-associated peptide transforming growth factor beta 1 |
| ADA                         | Adenosine Deaminase                                           | LIF                               | Leukemia inhibitory factor                                   |
| AXIN-1                      | Axin-1                                                        | MCP1                              | Monocyte chemotactic protein 1                               |
| BetaNGF                     | Beta-nerve growth factor                                      | MCP3                              | Monocyte chemotactic protein 3                               |
| CASP8                       | Caspase 8                                                     | MCP4                              | Monocyte chemotactic protein 4                               |
| CCL3                        | C-C motif chemokine 3                                         | MMP10                             | Matrix metalloproteinase 10                                  |
| CCL4                        | C-C motif chemokine 4                                         | OPG                               | Osteoprotegerin                                              |
| CCL11                       | C-C motif chemokine 11                                        | OSM                               | Oncostatin-M                                                 |
| CCL19                       | C-C motif chemokine 19                                        | PDL1                              | Programmed cell death ligand 1                               |
| CCL20                       | C-C motif chemokine 20                                        | SIRT2                             | SIR2-like protein 2                                          |
| CD5                         | Cluster of Differentiation 5                                  | SLAMF-1                           | Signaling lymphocytic activation molecule                    |
| CD40                        | Cluster of Differentiation 40                                 | STAMPB                            | STAM-binding protein                                         |
| CD244                       | Cluster of Differentiation 244                                | TNFRSF9                           | Tumor necrosis factor receptor superfamily member 9          |
| CDCP1                       | CUB domain-containing protein 1                               | TNFSF14                           | Tumor necrosis factor ligand superfamily member 14           |
| CSF1                        | Macrophage colony-stimulating factor 1                        | TRAIL                             | TNF-related apoptosis-inducing ligand                        |
| CST5                        | Cystatin D                                                    | TRANCE                            | TNF-related activation-induced cytokine                      |
| CXCL5                       | C-X-C motif chemokine 5                                       | uPA                               | Urokinase-type plasminogen activator                         |
| CXCL6                       | C-X-C motif chemokine 6                                       | VEGFA                             | Vascular endothelial growth factor A                         |
| ENRAGE                      | Protein S100-A12                                              |                                   |                                                              |
| FGF19                       | Fibroblast growth factor 19                                   |                                   |                                                              |
| FGF21                       | Fibroblast growth factor 21                                   |                                   |                                                              |
| FGF23                       | Fibroblast growth factor 23                                   |                                   |                                                              |
| Flt3L                       | Fms-related tyrosine kinase 3 ligand                          |                                   |                                                              |
| HGF                         | Hepatocyte growth factor                                      |                                   |                                                              |
| IL-2                        | Interleukin 2                                                 |                                   |                                                              |
| IL-4                        | Interleukin 4                                                 |                                   |                                                              |
| IL-5                        | Interleukin 5                                                 |                                   |                                                              |
| IL-6                        | Interleukin 6                                                 |                                   |                                                              |
| IL-7                        | Interleukin 7                                                 |                                   |                                                              |
| IL-10                       | Interleukin 10                                                |                                   |                                                              |
| IL-10RB                     | Interleukin 10 receptor beta                                  |                                   |                                                              |
| IL-12B                      | Interleukin 12 subunit beta                                   |                                   |                                                              |
| IL-18                       | Interleukin 18                                                |                                   |                                                              |
| IL-18R1                     | Interleukin 18 receptor 1                                     |                                   |                                                              |
